# Supplementary material for: Knowledge, experiences, and attitudes of Australian General Practitioners towards medicinal cannabis: a 2021–2022 survey
Source: Springer Nature journal article supplement (doi:10.1186/s12875-022-01946-x), 2022-12-19
Supplement: MOESM1 [file 12875_2022_1946_MOESM1_ESM.pdf]

## Supplementary Material

**Table S1.** Experiences around Patient Enquiries and Prescribing (n=505)

| Experience                              |                                             | n=505 | %    |
|-----------------------------------------|---------------------------------------------|-------|------|
| <b>MC Enquiries in past 3 Months</b>    | Nil                                         | 74    | 14.7 |
|                                         | 1-4                                         | 280   | 55.4 |
|                                         | 5-9                                         | 103   | 20.4 |
|                                         | 10-19                                       | 30    | 5.9  |
|                                         | 20 or more                                  | 18    | 3.6  |
| <b>Comfortable Discussing Enquiries</b> | Yes                                         | 264   | 52.3 |
|                                         | No                                          | 241   | 47.7 |
| <b>MC Prescriber</b>                    | Yes                                         | 110   | 21.8 |
|                                         | No                                          | 395   | 78.2 |
| <b>Prescriptions in Past 3 Months</b>   | 0                                           | 410   | 81.2 |
|                                         | 1-9                                         | 66    | 13.1 |
|                                         | 10-19                                       | 15    | 3.0  |
|                                         | 20-49                                       | 11    | 2.2  |
|                                         | 50 or more                                  | 3     | 0.6  |
| <b>Type of Prescriptions</b>            | Repeat                                      | 43    | 8.5  |
|                                         | New Prescription                            | 67    | 13.3 |
| <b>Product Type (THC and/or CBD)</b>    | THC Dominant                                | 30    | 5.9  |
|                                         | CBD Dominant                                | 79    | 15.6 |
|                                         | THC and CBD Combination                     | 78    | 15.4 |
| <b>Distinct Products Prescribed</b>     | 1                                           | 36    | 7.1  |
|                                         | 2                                           | 21    | 4.2  |
|                                         | 3                                           | 24    | 4.8  |
|                                         | 4                                           | 12    | 2.4  |
|                                         | More than 5                                 | 17    | 3.4  |
| <b>Formulation Types Prescribed</b>     | Capsules                                    | 12    | 2.4  |
|                                         | Oil                                         | 104   | 20.6 |
|                                         | Sprays                                      | 9     | 1.8  |
|                                         | Flower (flos, plant material)               | 29    | 5.7  |
|                                         | Other oral products e.g., tablets, lozenges | 3     | 0.6  |
| <b>MC Prescribing Pathway Used</b>      | Special-Access Scheme B                     | 92    | 18.2 |
|                                         | Authorised Prescriber Scheme                | 38    | 7.5  |
| <b>Are Pathways User Friendly?</b>      | Yes                                         | 55    | 10.9 |
|                                         | No                                          | 55    | 10.9 |
| <b>Support for Legal cannabis</b>       | Medicinal                                   | 72    | 14.3 |
|                                         | Recreational                                | 0     | 0    |
|                                         | Both                                        | 38    | 7.5  |

MC: Medicinal cannabis.

**Table S2.** Indications that prescribers have treated with medicinal cannabis (n=110, valid percentage)

| MC Prescribed for Condition              | N=110 | %    |
|------------------------------------------|-------|------|
| Chronic Non-Cancer Pain                  | 102   | 92.7 |
| Anxiety                                  | 72    | 65.5 |
| Neuropathic Pain                         | 68    | 61.8 |
| Insomnia                                 | 51    | 46.4 |
| PTSD                                     | 43    | 39.0 |
| Chronic Cancer Pain                      | 42    | 38.2 |
| Depression                               | 35    | 32.0 |
| End of Life/Palliative Care              | 28    | 25.5 |
| Chemotherapy-Induced Nausea and Vomiting | 19    | 17.3 |
| Spasticity in Multiple Sclerosis         | 16    | 14.5 |
| Other                                    | 13    | 11.8 |
| Dementia Patients with Agitation         | 10    | 9.1  |
| Intractable Epilepsy                     | 7     | 6.4  |
| Cachexia Associated with Severe Illness  | 6     | 5.5  |
| Anti-Tumour Effects                      | 3     | 2.7  |

MC: Medicinal cannabis; PTSD: Post-traumatic stress disorder.

**Table S3.**  $\chi^2$  Test Values for each of the Knowledge questions in the GP Survey

| Knowledge Question Number | Topic            | $\chi^2$ Test Value                   |
|---------------------------|------------------|---------------------------------------|
| Questions 1               | Knowledge        | ( $\chi^2(2) = 120.5$ , $p < 0.001$ ) |
| Questions 2               | AMA              | ( $\chi^2(2) = 33.6$ , $p < 0.001$ )  |
| Questions 3               | RACGP            | ( $\chi^2(2) = 35.8$ , $p < 0.001$ )  |
| Questions 4               | MC formulations  | ( $\chi^2(2) = 88.8$ , $p < 0.001$ )  |
| Questions 5               | Helping patients | ( $\chi^2(2) = 83.6$ , $p < 0.001$ )  |

**Table S4.** Differences in support for common MC indications between the current survey and the original survey (Karanges et al., 2018)

| Indication                  | % Support Current Survey (N=505) | % Support Original Survey (N=640) | % Difference |
|-----------------------------|----------------------------------|-----------------------------------|--------------|
| Anxiety                     | 49.3                             | 13                                | 36.3         |
| Insomnia                    | 47.4                             | 13.2                              | 34.2         |
| PTSD                        | 50.9                             | 19                                | 31.9         |
| Chronic Non-Cancer Pain     | 70.3                             | 39.1                              | 31.2         |
| Neuropathic Pain            | 66.9                             | 38.3                              | 28.6         |
| Depression                  | 37.2                             | 9.4                               | 27.8         |
| CINV                        | 86.7                             | 64.7                              | 22           |
| Cachexia                    | 73.5                             | 56.7                              | 16.8         |
| End of Life/Palliative Care | 92.7                             | 78.8                              | 13.9         |
| Intractable Epilepsy        | 83.3                             | 70.3                              | 13           |
| Chronic Cancer Pain         | 91.9                             | 80.2                              | 11.7         |
| Dementia with Agitation     | 50.9                             | 40.2                              | 10.7         |
| Spasticity in MS            | 69.1                             | 61.2                              | 7.9          |

**Section 1 - Anonymous demographic information**

Age category

☐ Under 24  
☐ 25-34  
☐ 35-44  
☐ 45-54  
☐ 55-64  
☐ Over 65

Gender

☐ Male  
☐ Female  
☐ Other

State/Territory of your practice

☐ NSW  
☐ VIC  
☐ QLD  
☐ SA  
☐ TAS  
☐ WA  
☐ ACT  
☐ NT

Are you a GP registrar?

☐ Yes  
☐ No

Years in General Practice

☐ Less than 1  
☐ 1 - 4  
☐ 5 - 9  
☐ 10 - 14  
☐ 15 - 19  
☐ 20 - 24  
☐ 25 - 29  
☐ More than 30

Average hours spent in clinical practice per week

☐ Less than 10  
☐ 11 - 20  
☐ 21 - 30  
☐ 31 - 40  
☐ More than 40

How many GPs work at your practice?

☐ 1  
☐ 2 - 4  
☐ 5 - 9  
☐ 10 - 20  
☐ More than 20

Geographical area serviced (Select all that apply)

☐ Metro  
☐ Regional  
☐ Remote

What is the post code of the practice where you work?  
(Optional)

\_\_\_\_\_

**Section 2 - Medicinal cannabis experience**

In the past 3 months, how many of your patients have enquired about medicinal cannabis products?

- ☐ 0  
☐ 1-4  
☐ 5-9  
☐ 10-19  
☐ 20+

Do you feel comfortable discussing medicinal cannabis as a treatment option with your patients?

- ☐ Yes  
☐ No

Have you prescribed medicinal cannabis?

- ☐ Yes  
☐ No

In the past 3 months, how many medicinal cannabis prescriptions have you provided?

- ☐ 0  
☐ 1-9  
☐ 10-19  
☐ 20-49  
☐ 50-99  
☐ 100-149  
☐ 150+

Are the majority of your medicinal cannabis prescriptions repeats or new prescriptions?

- ☐ Repeats  
☐ New Prescriptions

What type of medicinal cannabis products have you prescribed? (Tick all that apply)

- ☐ THC dominant (Schedule 8)  
☐ CBD dominant (Schedule 4)  
☐ THC & CBD combination (Schedule 8)

How many distinct medicinal cannabis products do you currently prescribe?

- ☐ 1  
☐ 2  
☐ 3  
☐ 4  
☐ More than 5

What formulations of medicinal cannabis have you prescribed? (Tick all that apply)

- ☐ Capsules  
☐ Oil  
☐ Sprays  
☐ Flower (Flos, plant material)  
☐ Other oral products e.g., tablets, lozenges

How have you prescribed medicinal cannabis products? (Tick all that apply)

- ☐ Special-Access Scheme B  
☐ Authorised Prescriber Scheme

Do you believe the TGA approval process for medicinal cannabis is doctor-friendly?

- ☐ Yes  
☐ No

Do you believe cannabinoids should be legally available for the following purposes?

- ☐ Medicinal  
☐ Recreational  
☐ Both

---

I have prescribed medicinal cannabis products for the following conditions (tick all that apply)

- ☐ Chronic cancer pain
- ☐ Chronic non-cancer pain
- ☐ Neuropathic pain
- ☐ Intractable epilepsy
- ☐ End of life/Palliative care
- ☐ Chemotherapy-induced nausea and vomiting
- ☐ Cachexia associated with severe illness
- ☐ Anti-tumour effects
- ☐ Spasticity in Multiple Sclerosis
- ☐ Dementia patients with agitation
- ☐ Insomnia
- ☐ PTSD
- ☐ Anxiety
- ☐ Depression
- ☐ Other (please specify)

---

Other, please specify

---

**Please indicate how much you agree or disagree with each of the following statements**

|                                                                                                                   | Strongly Agree        | Slightly Agree        | Neutral               | Slightly Disagree     | Strongly Disagree     |
|-------------------------------------------------------------------------------------------------------------------|-----------------------|-----------------------|-----------------------|-----------------------|-----------------------|
| I know how to help patients legally access medicinal cannabis                                                     | <input type="radio"/> | <input type="radio"/> | <input type="radio"/> | <input type="radio"/> | <input type="radio"/> |
| I am aware of the different medicinal cannabis products and formulations currently available                      | <input type="radio"/> | <input type="radio"/> | <input type="radio"/> | <input type="radio"/> | <input type="radio"/> |
| I understand the current RACGP position on medicinal cannabis                                                     | <input type="radio"/> | <input type="radio"/> | <input type="radio"/> | <input type="radio"/> | <input type="radio"/> |
| I understand the current AMA position on medicinal cannabis                                                       | <input type="radio"/> | <input type="radio"/> | <input type="radio"/> | <input type="radio"/> | <input type="radio"/> |
| I am supportive of CBD products available over the counter in pharmacies                                          | <input type="radio"/> | <input type="radio"/> | <input type="radio"/> | <input type="radio"/> | <input type="radio"/> |
| Medicinal cannabis should only be prescribed by GPs in conjunction with specialists                               | <input type="radio"/> | <input type="radio"/> | <input type="radio"/> | <input type="radio"/> | <input type="radio"/> |
| Only GPs who have undergone specific training and credentialing should be allowed to prescribe medicinal cannabis | <input type="radio"/> | <input type="radio"/> | <input type="radio"/> | <input type="radio"/> | <input type="radio"/> |
| There is sufficient scientific evidence on the efficacy of medicinal cannabis                                     | <input type="radio"/> | <input type="radio"/> | <input type="radio"/> | <input type="radio"/> | <input type="radio"/> |

**When considering prescribing medicinal cannabis**

|                                                                               | Strongly agree        | Slightly agree        | Neutral               | Slightly disagree     | Strongly disagree     |
|-------------------------------------------------------------------------------|-----------------------|-----------------------|-----------------------|-----------------------|-----------------------|
| The risk of side effects is too high                                          | <input type="radio"/> | <input type="radio"/> | <input type="radio"/> | <input type="radio"/> | <input type="radio"/> |
| The risk of abuse and dependence is too high                                  | <input type="radio"/> | <input type="radio"/> | <input type="radio"/> | <input type="radio"/> | <input type="radio"/> |
| I am concerned about the effects on driving                                   | <input type="radio"/> | <input type="radio"/> | <input type="radio"/> | <input type="radio"/> | <input type="radio"/> |
| I am concerned about drug seeking patients                                    | <input type="radio"/> | <input type="radio"/> | <input type="radio"/> | <input type="radio"/> | <input type="radio"/> |
| I do not have enough knowledge of its application in clinical practice        | <input type="radio"/> | <input type="radio"/> | <input type="radio"/> | <input type="radio"/> | <input type="radio"/> |
| The prescribing process is too difficult                                      | <input type="radio"/> | <input type="radio"/> | <input type="radio"/> | <input type="radio"/> | <input type="radio"/> |
| I am not convinced of the clinical efficacy                                   | <input type="radio"/> | <input type="radio"/> | <input type="radio"/> | <input type="radio"/> | <input type="radio"/> |
| It is too costly                                                              | <input type="radio"/> | <input type="radio"/> | <input type="radio"/> | <input type="radio"/> | <input type="radio"/> |
| There is sufficient scientific evidence on the efficacy of medicinal cannabis | <input type="radio"/> | <input type="radio"/> | <input type="radio"/> | <input type="radio"/> | <input type="radio"/> |

**I support the use of medicinal cannabis products in patients with**

|                                          | Strongly agree        | Slightly agree        | Neutral               | Slightly disagree     | Strongly disagree     |
|------------------------------------------|-----------------------|-----------------------|-----------------------|-----------------------|-----------------------|
| Chronic cancer pain                      | <input type="radio"/> | <input type="radio"/> | <input type="radio"/> | <input type="radio"/> | <input type="radio"/> |
| Chronic non-cancer pain                  | <input type="radio"/> | <input type="radio"/> | <input type="radio"/> | <input type="radio"/> | <input type="radio"/> |
| Neuropathic pain                         | <input type="radio"/> | <input type="radio"/> | <input type="radio"/> | <input type="radio"/> | <input type="radio"/> |
| Intractable epilepsy                     | <input type="radio"/> | <input type="radio"/> | <input type="radio"/> | <input type="radio"/> | <input type="radio"/> |
| End of life/Palliative care              | <input type="radio"/> | <input type="radio"/> | <input type="radio"/> | <input type="radio"/> | <input type="radio"/> |
| Chemotherapy-induced nausea and vomiting | <input type="radio"/> | <input type="radio"/> | <input type="radio"/> | <input type="radio"/> | <input type="radio"/> |
| Cachexia associated with severe illness  | <input type="radio"/> | <input type="radio"/> | <input type="radio"/> | <input type="radio"/> | <input type="radio"/> |
| Anti-tumour effects                      | <input type="radio"/> | <input type="radio"/> | <input type="radio"/> | <input type="radio"/> | <input type="radio"/> |
| Spasticity in Multiple Sclerosis         | <input type="radio"/> | <input type="radio"/> | <input type="radio"/> | <input type="radio"/> | <input type="radio"/> |
| Dementia patients with agitation         | <input type="radio"/> | <input type="radio"/> | <input type="radio"/> | <input type="radio"/> | <input type="radio"/> |
| Insomnia                                 | <input type="radio"/> | <input type="radio"/> | <input type="radio"/> | <input type="radio"/> | <input type="radio"/> |
| PTSD                                     | <input type="radio"/> | <input type="radio"/> | <input type="radio"/> | <input type="radio"/> | <input type="radio"/> |
| Anxiety                                  | <input type="radio"/> | <input type="radio"/> | <input type="radio"/> | <input type="radio"/> | <input type="radio"/> |
| Depression                               | <input type="radio"/> | <input type="radio"/> | <input type="radio"/> | <input type="radio"/> | <input type="radio"/> |



**The major concerns with THC containing products include:**

|                                      | Strongly agree        | Slightly agree        | Neutral               | Slightly disagree     | Strongly disagree     |
|--------------------------------------|-----------------------|-----------------------|-----------------------|-----------------------|-----------------------|
| Addiction and dependence             | <input type="radio"/> | <input type="radio"/> | <input type="radio"/> | <input type="radio"/> | <input type="radio"/> |
| Cognitive impairment                 | <input type="radio"/> | <input type="radio"/> | <input type="radio"/> | <input type="radio"/> | <input type="radio"/> |
| Driving impairment                   | <input type="radio"/> | <input type="radio"/> | <input type="radio"/> | <input type="radio"/> | <input type="radio"/> |
| Weight gain                          | <input type="radio"/> | <input type="radio"/> | <input type="radio"/> | <input type="radio"/> | <input type="radio"/> |
| Psychosis                            | <input type="radio"/> | <input type="radio"/> | <input type="radio"/> | <input type="radio"/> | <input type="radio"/> |
| Other long-term mental health issues | <input type="radio"/> | <input type="radio"/> | <input type="radio"/> | <input type="radio"/> | <input type="radio"/> |
| Interactions with other medications  | <input type="radio"/> | <input type="radio"/> | <input type="radio"/> | <input type="radio"/> | <input type="radio"/> |
| Impact on the developing brain       | <input type="radio"/> | <input type="radio"/> | <input type="radio"/> | <input type="radio"/> | <input type="radio"/> |
| Lack of Efficacy                     | <input type="radio"/> | <input type="radio"/> | <input type="radio"/> | <input type="radio"/> | <input type="radio"/> |

**The major concerns with CBD containing products include:**

|                                      | Strongly agree        | Slightly agree        | Neutral               | Slightly disagree     | Strongly disagree     |
|--------------------------------------|-----------------------|-----------------------|-----------------------|-----------------------|-----------------------|
| Addiction and dependence             | <input type="radio"/> | <input type="radio"/> | <input type="radio"/> | <input type="radio"/> | <input type="radio"/> |
| Cognitive impairment                 | <input type="radio"/> | <input type="radio"/> | <input type="radio"/> | <input type="radio"/> | <input type="radio"/> |
| Driving impairment                   | <input type="radio"/> | <input type="radio"/> | <input type="radio"/> | <input type="radio"/> | <input type="radio"/> |
| Weight gain                          | <input type="radio"/> | <input type="radio"/> | <input type="radio"/> | <input type="radio"/> | <input type="radio"/> |
| Psychosis                            | <input type="radio"/> | <input type="radio"/> | <input type="radio"/> | <input type="radio"/> | <input type="radio"/> |
| Other long-term mental health issues | <input type="radio"/> | <input type="radio"/> | <input type="radio"/> | <input type="radio"/> | <input type="radio"/> |
| Interactions with other medications  | <input type="radio"/> | <input type="radio"/> | <input type="radio"/> | <input type="radio"/> | <input type="radio"/> |
| Impact on the developing brain       | <input type="radio"/> | <input type="radio"/> | <input type="radio"/> | <input type="radio"/> | <input type="radio"/> |
| Lack of Efficacy                     | <input type="radio"/> | <input type="radio"/> | <input type="radio"/> | <input type="radio"/> | <input type="radio"/> |

**Medicinal cannabis is generally more hazardous than:**

|                      | Strongly agree        | Slightly agree        | Neutral               | Slightly disagree     | Strongly disagree     |
|----------------------|-----------------------|-----------------------|-----------------------|-----------------------|-----------------------|
| Prescription opioids | <input type="radio"/> | <input type="radio"/> | <input type="radio"/> | <input type="radio"/> | <input type="radio"/> |
| Benzodiazepines      | <input type="radio"/> | <input type="radio"/> | <input type="radio"/> | <input type="radio"/> | <input type="radio"/> |
| Antipsychotics       | <input type="radio"/> | <input type="radio"/> | <input type="radio"/> | <input type="radio"/> | <input type="radio"/> |
| Statins              | <input type="radio"/> | <input type="radio"/> | <input type="radio"/> | <input type="radio"/> | <input type="radio"/> |
| Chemotherapy drugs   | <input type="radio"/> | <input type="radio"/> | <input type="radio"/> | <input type="radio"/> | <input type="radio"/> |
| Antidepressants      | <input type="radio"/> | <input type="radio"/> | <input type="radio"/> | <input type="radio"/> | <input type="radio"/> |

Please provide any further comments, questions or opinions about medicinal cannabis in Australia

---
